# Supplementary material
Source: PubMed Central journal article supplement (PMC6994386)

Figure E1

A/

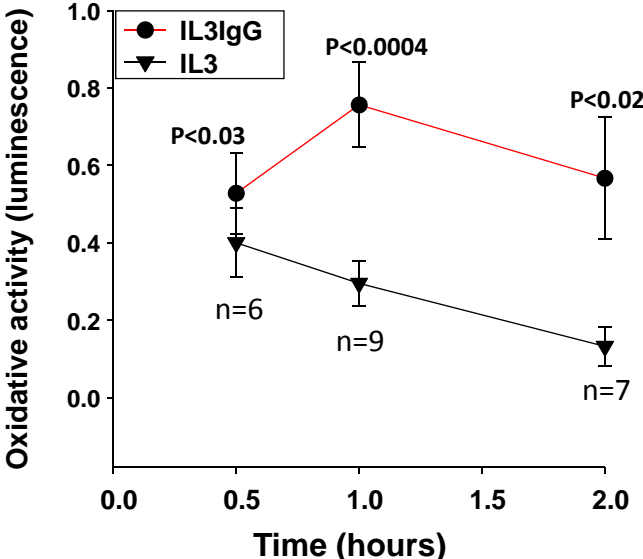

B/

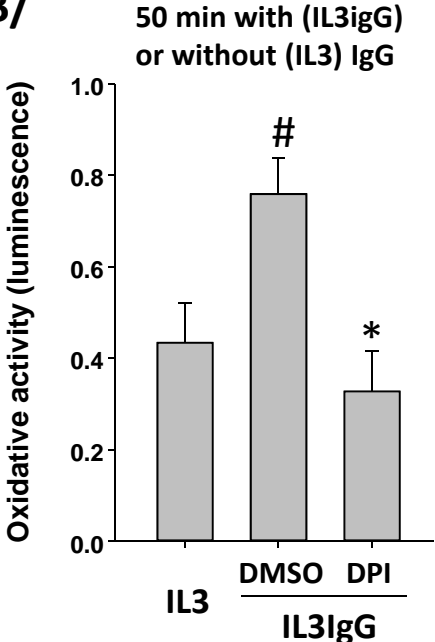

Supplement: NIHMS1060839-supplement-Supp_FigS1.pdf [file NIHMS1060839-supplement-Supp_FigS1.pdf]

Figure E2

A/

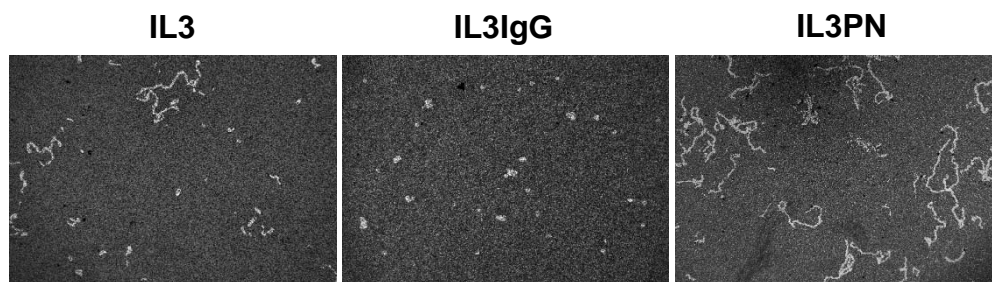

B/

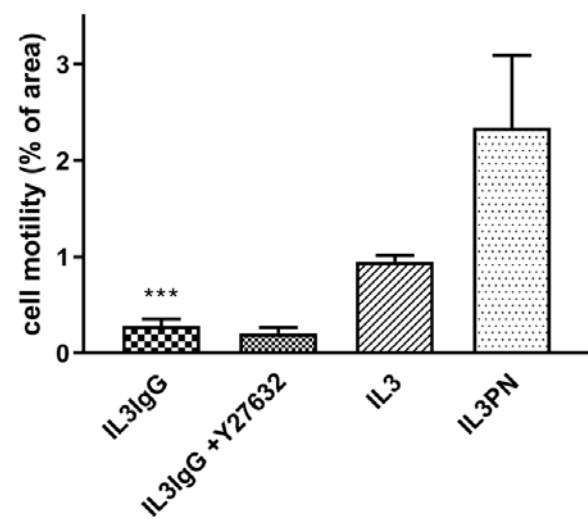

Supplement: NIHMS1060839-supplement-Supp_FigS2.pdf [file NIHMS1060839-supplement-Supp_FigS2.pdf]

Figure E3

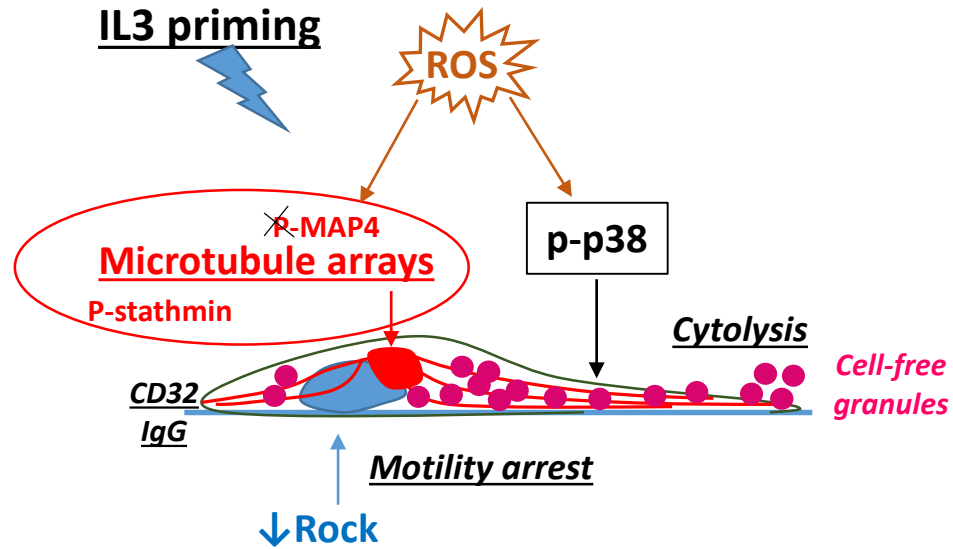

Supplement: NIHMS1060839-supplement-Supp_FigS3.pdf [file NIHMS1060839-supplement-Supp_FigS3.pdf]
